# Supplementary material
Source: publisher figshare collection journal article supplement (https://asha.figshare.com/articles/dataset/_/23518845)
Supplement: Supplementary file 1 [file 1]

**Supplemental Material S2.** Sample sentences with rare vocabulary words.

**Sample Sentences Including Rare Vocabulary**

---

She's a really creative girl.

It can transform its face after you turn this button.

I have a smock that I can paint on  
And we're waiting for them to turn  
into chrysalis.

Can you scoot me over?

Well she disguised and then she takes off her costume.

---
