# Supplementary material
Source: publisher figshare collection journal article supplement (https://asha.figshare.com/articles/dataset/_/23518845)
Supplement: Supplementary file 2 [file 1]

# Supplemental Material S1. Descriptives by study.

|                                            | Schuele & Spencer (2012)                   | Kelley & Kinney (2017)                                                       | Kelley & Bueno (2022)                                                                                                           | Overall                                                                                                                      |
|--------------------------------------------|--------------------------------------------|------------------------------------------------------------------------------|---------------------------------------------------------------------------------------------------------------------------------|------------------------------------------------------------------------------------------------------------------------------|
| Measure                                    | <i>M</i> ( <i>SD</i> )<br>Range            | <i>M</i> ( <i>SD</i> )<br>Range                                              | <i>M</i> ( <i>SD</i> )<br>Range                                                                                                 | <i>M</i> ( <i>SD</i> )<br>Range                                                                                              |
| <i>N</i>                                   | 37                                         | 15                                                                           | 22                                                                                                                              | 74                                                                                                                           |
| Age (months)                               | 54.32 (4.01)<br>47-63                      | 58.80 (4.40)<br>51-65                                                        | 57.82 (6.49)<br>47-69                                                                                                           | 56.27 (5.26)<br>47-69                                                                                                        |
| Gender                                     | 23 female,<br>14 male                      | 7 female,<br>8 male                                                          | 9 female,<br>13 male                                                                                                            | 39 female,<br>35 male                                                                                                        |
| Race                                       | 31 Black, 3 White, 3 More<br>than one race | 9 White, 5 Asian                                                             | 15 White, 4 More than<br>one Race, 2 Asian                                                                                      | 31 Black, 27 White, 7<br>Asian, 7 More than one<br>race                                                                      |
| Home Language<br>in Addition to<br>English | None per teacher report                    | 2 per parent report                                                          | None per parent report                                                                                                          | 2 per parent report                                                                                                          |
| Caregiver<br>Education                     | Not reported                               | 13 reported: 4<br>bachelor's degree, 9<br>graduate or<br>professional degree | 21 reported: 2 some 4-<br>year college, 1<br>associate degree, 6<br>bachelor's degree, 12<br>graduate or professional<br>degree | 34 reported: 2 some 4-year<br>college, 1 associate<br>degree, 10 bachelor's<br>degree, 21 graduate or<br>professional degree |
| PPVT-4                                     | 92.86 (9.32)<br>75-114                     | 116.07 (15.64)<br>86-139                                                     | 112.73 (12.87)<br>84-142                                                                                                        | 103.47 (15.90)<br>78-137                                                                                                     |
| EVT-2                                      | 96.49 (9.92)<br>78-118                     | 116.07 (11.18)<br>97-137                                                     | 110.45 (11.95)<br>92-135                                                                                                        | 104.61 (13.58)<br>78-137                                                                                                     |
| Total Number of<br>Utterances              | 205.30 (44.04)<br>102-276                  | 148.67 (31.03)<br>96-218                                                     | 163.23 (51.28)<br>65-260                                                                                                        | 181.34 (50.06)<br>65-276                                                                                                     |
| MLU                                        | 4.54 (0.81)<br>3.07-6.19                   | 5.14 (1.26)<br>2.7-7.04                                                      | 4.71 (1.18)<br>2.72-7.06                                                                                                        | 4.47 (1.04)<br>2.71-7.06                                                                                                     |
| NDW Rate                                   | 1.02 (0.15)<br>.74-1.35                    | 1.30 (0.29)<br>.72-1.77                                                      | 1.19 (0.22)<br>.88-1.70                                                                                                         | 1.12 (0.234)<br>.72-1.77                                                                                                     |
| Rare Word Types                            | 4.00 (2.16)<br>1-8                         | 3.73 (2.09)<br>1-7                                                           | 4.27 (3.23)<br>1-12                                                                                                             | 4.03 (2.48)<br>1-12                                                                                                          |

|                             |                          |                          |                        |                        |
|-----------------------------|--------------------------|--------------------------|------------------------|------------------------|
| Rare Word Tokens            | 5.38 (3.65)<br>1-14      | 5.40 (3.42)<br>1-13      | 5.50 (4.33)<br>1-15    | 5.42 (3.77)<br>1-15    |
| Rare Word Density           | .020 (.009)<br>.000-.040 | .026 (.015)<br>.010-.050 | .025 (.017)<br>.01-.07 | .023 (.013)<br>.00-.07 |
| Augmented Rare Word Types   | 5.27 (2.89)<br>1-11      | 6.07 (2.22)<br>1-9       | 6.23 (4.80)<br>1-18    | 5.72 (3.45)<br>1-18    |
| Augmented Rare Word Tokens  | 6.76 (4.33)<br>1-18      | 8.27 (3.50)<br>1-16      | 8.27 (6.69)<br>1-22    | 7.51 (5.00)<br>1-22    |
| Augmented Rare Word Density | .025 (.012)<br>.000-.050 | .042 (.015)<br>.01-.07   | .038 (.026)<br>.01-.10 | .032 (.019)<br>.00-.10 |

*Note.* The PPVT-4 and EVT-2 have a mean of 100 and a standard deviation of 15. PPVT-4 = Peabody Picture Vocabulary Test – Fourth Edition (Dunn & Dunn, 2007); EVT-2 = Expressive Vocabulary Test (Williams, 2007); MLU = mean length of utterance in morphemes, NDW Rate = index of lexical diversity; Rare Word Types, Tokens, Density used the original WERVE list; Augmented Rare Word Types, Tokens, Density used the WERVE list augmented with unique words from the preschool sample.

## References

- Dunn, L. M., & Dunn, D. M. (2007). *Peabody Picture Vocabulary Test–Fourth Edition*. NCS Pearson Assessments.
- Williams, K. (2007). *Expressive Vocabulary Test–Second Edition*. AGS.
